# Supplementary material for: Optimization of Plasma Sample Pretreatment for Quantitative Analysis Using iTRAQ Labeling and LC-MALDI-TOF/TOF
Source: PubMed Central journal article supplement (PMC4079693; doi:10.1371/journal.pone.0101694), 2014-07-02
Supplement: pone.0101694.s002.pdf [file pone.0101694.s002.pdf]

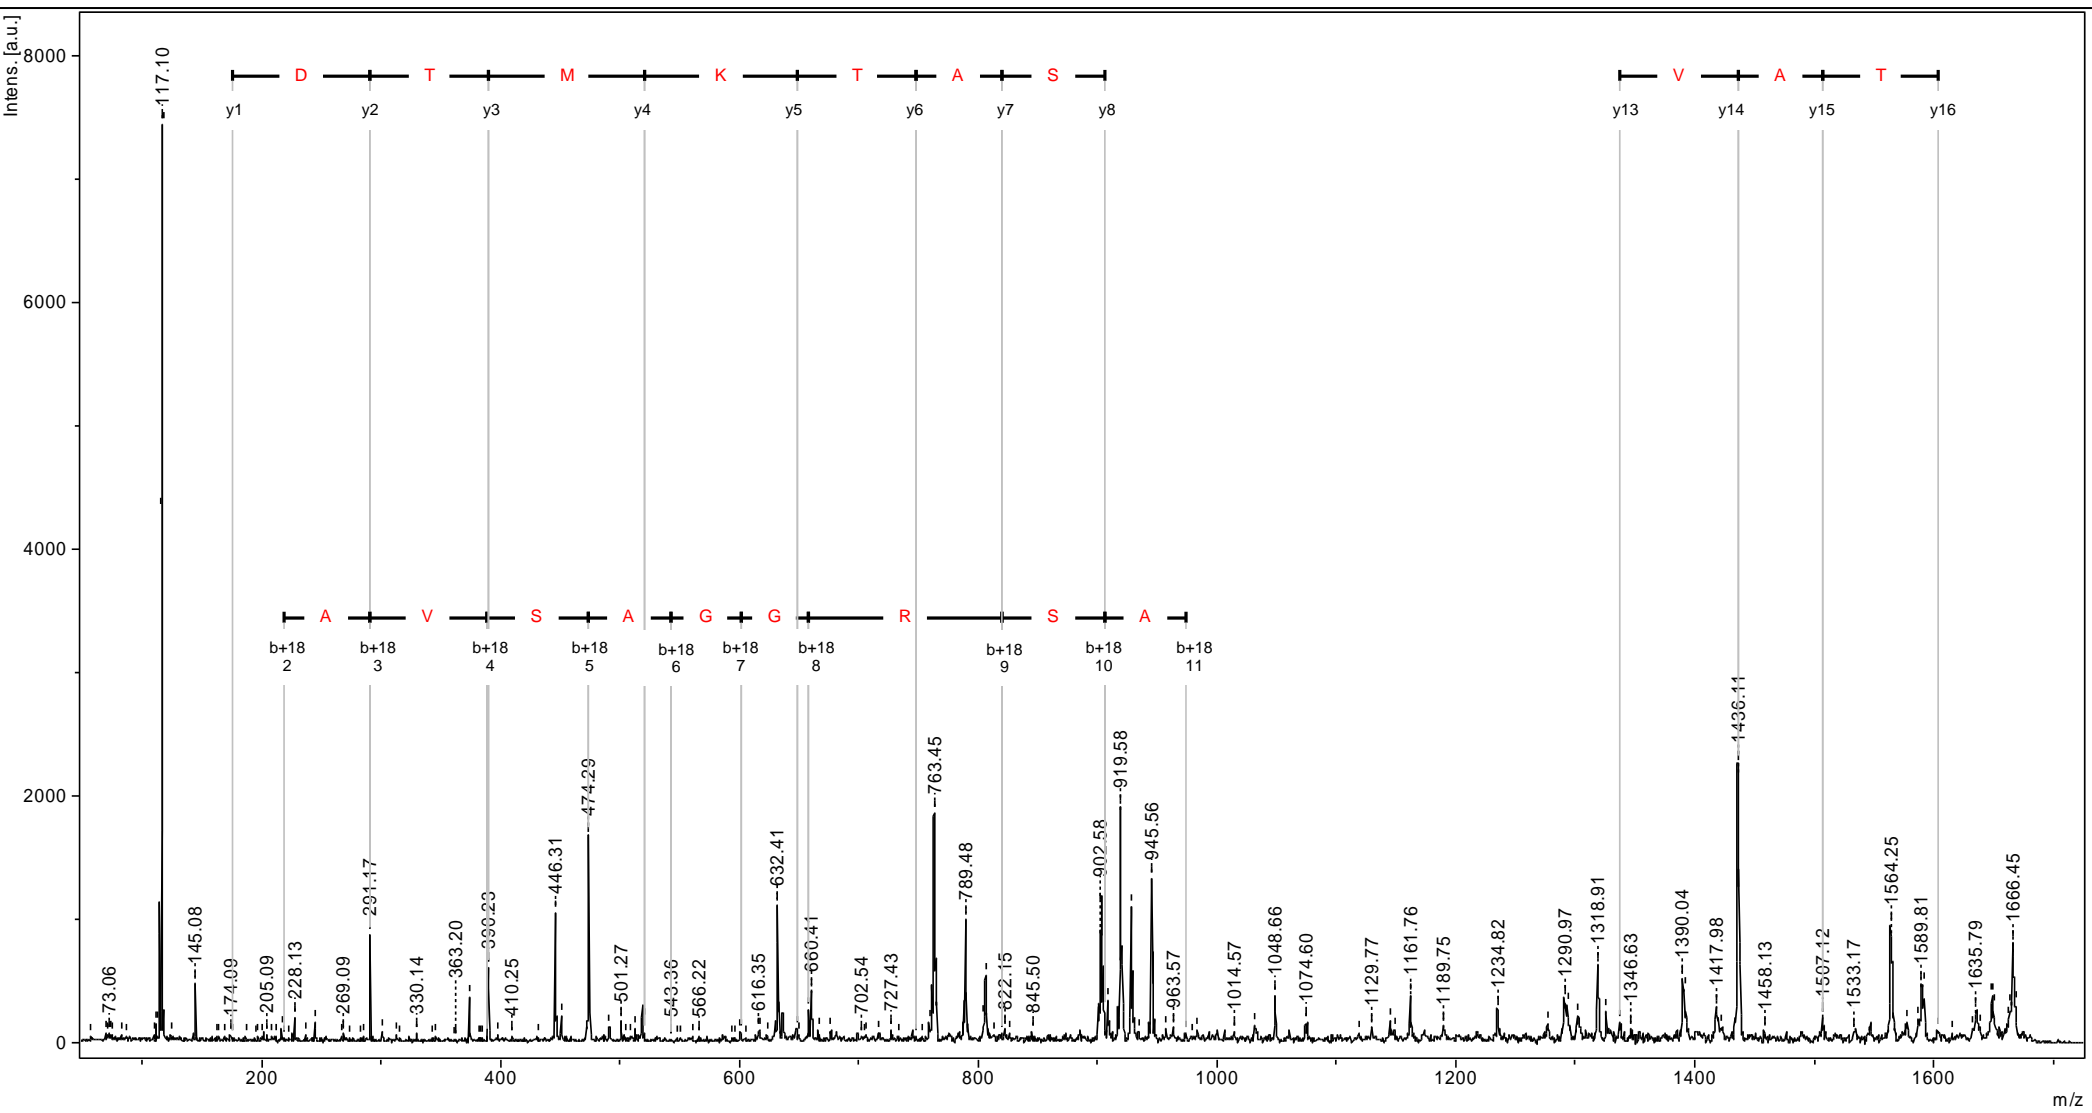

Interleukin-22 receptor subunit alpha-1 IL22RA1

VTAVSAGGRSATKMTDR 1706.061 Da

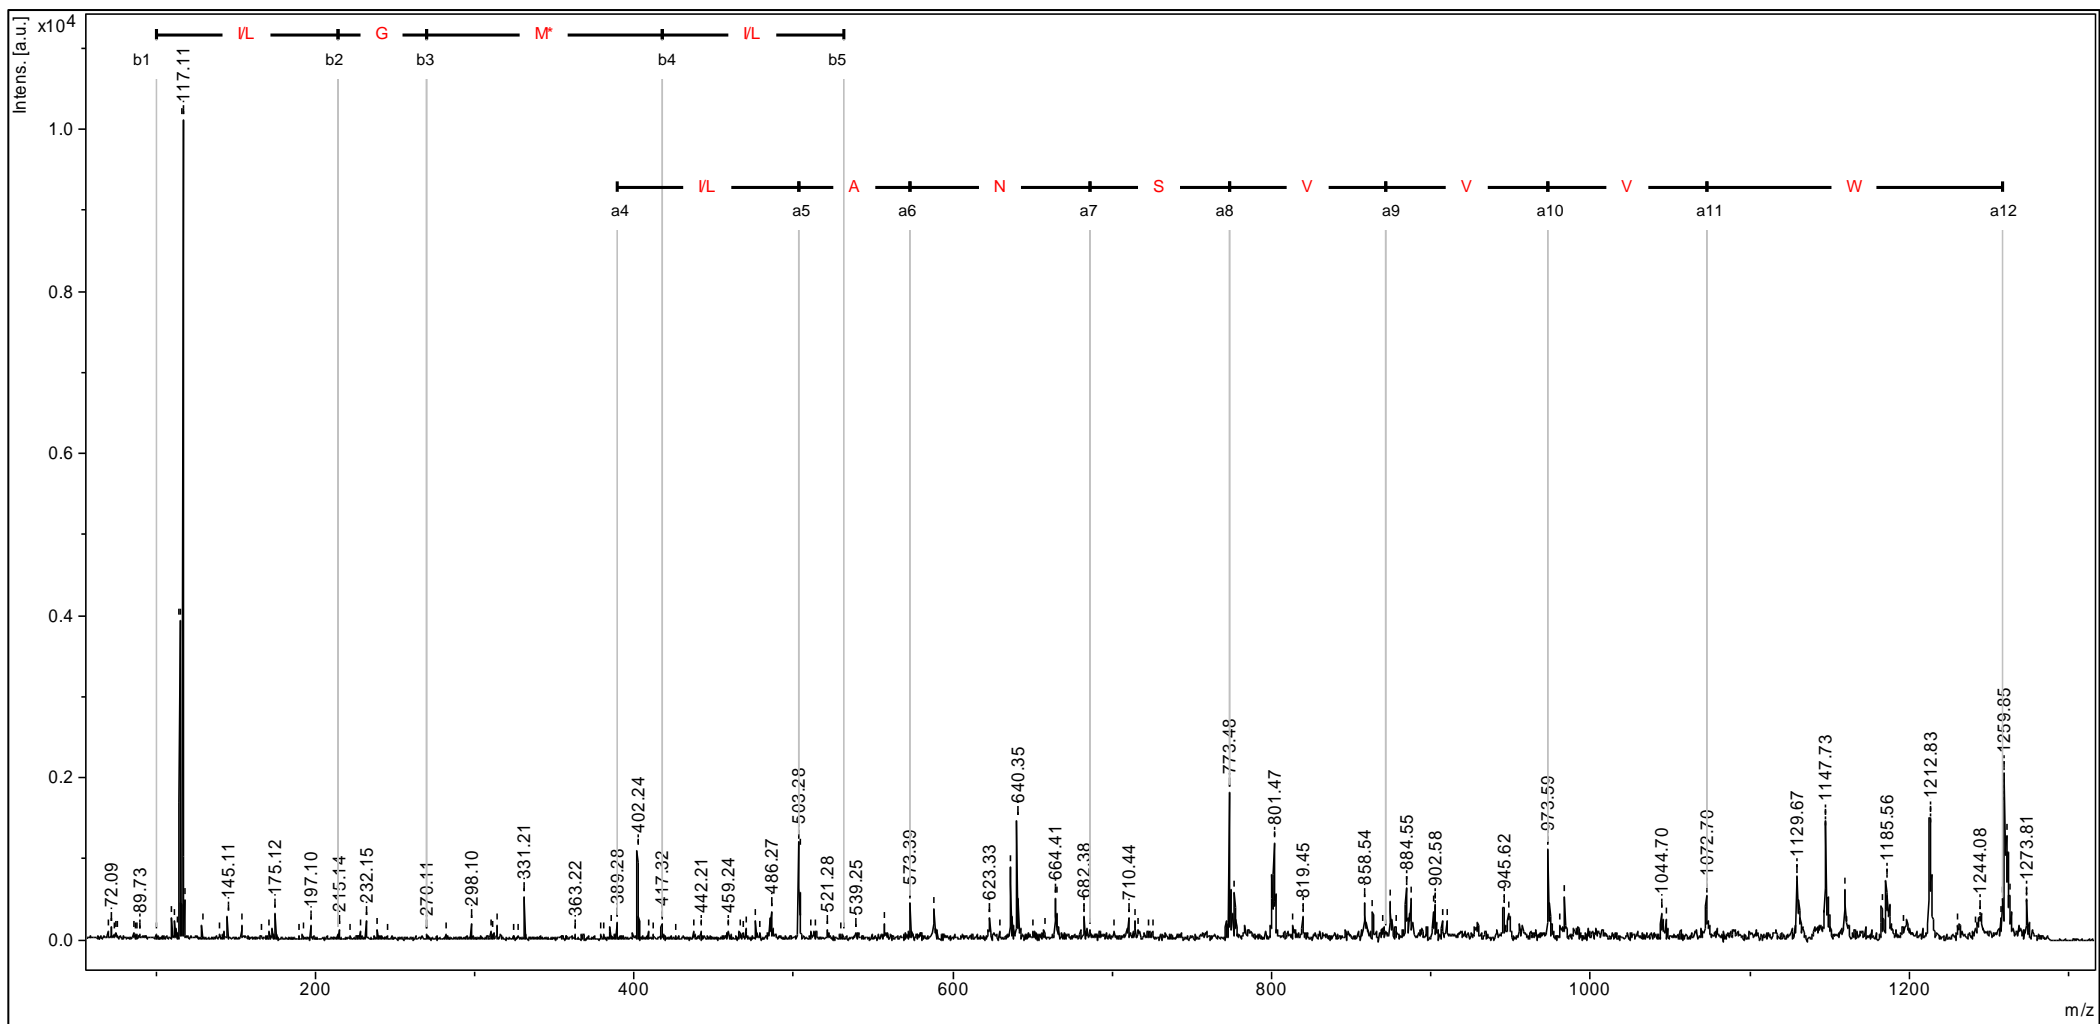

C-X-C chemokine receptor type 7 CXCR7

VIGMIANSVVVW

1303.792 Da

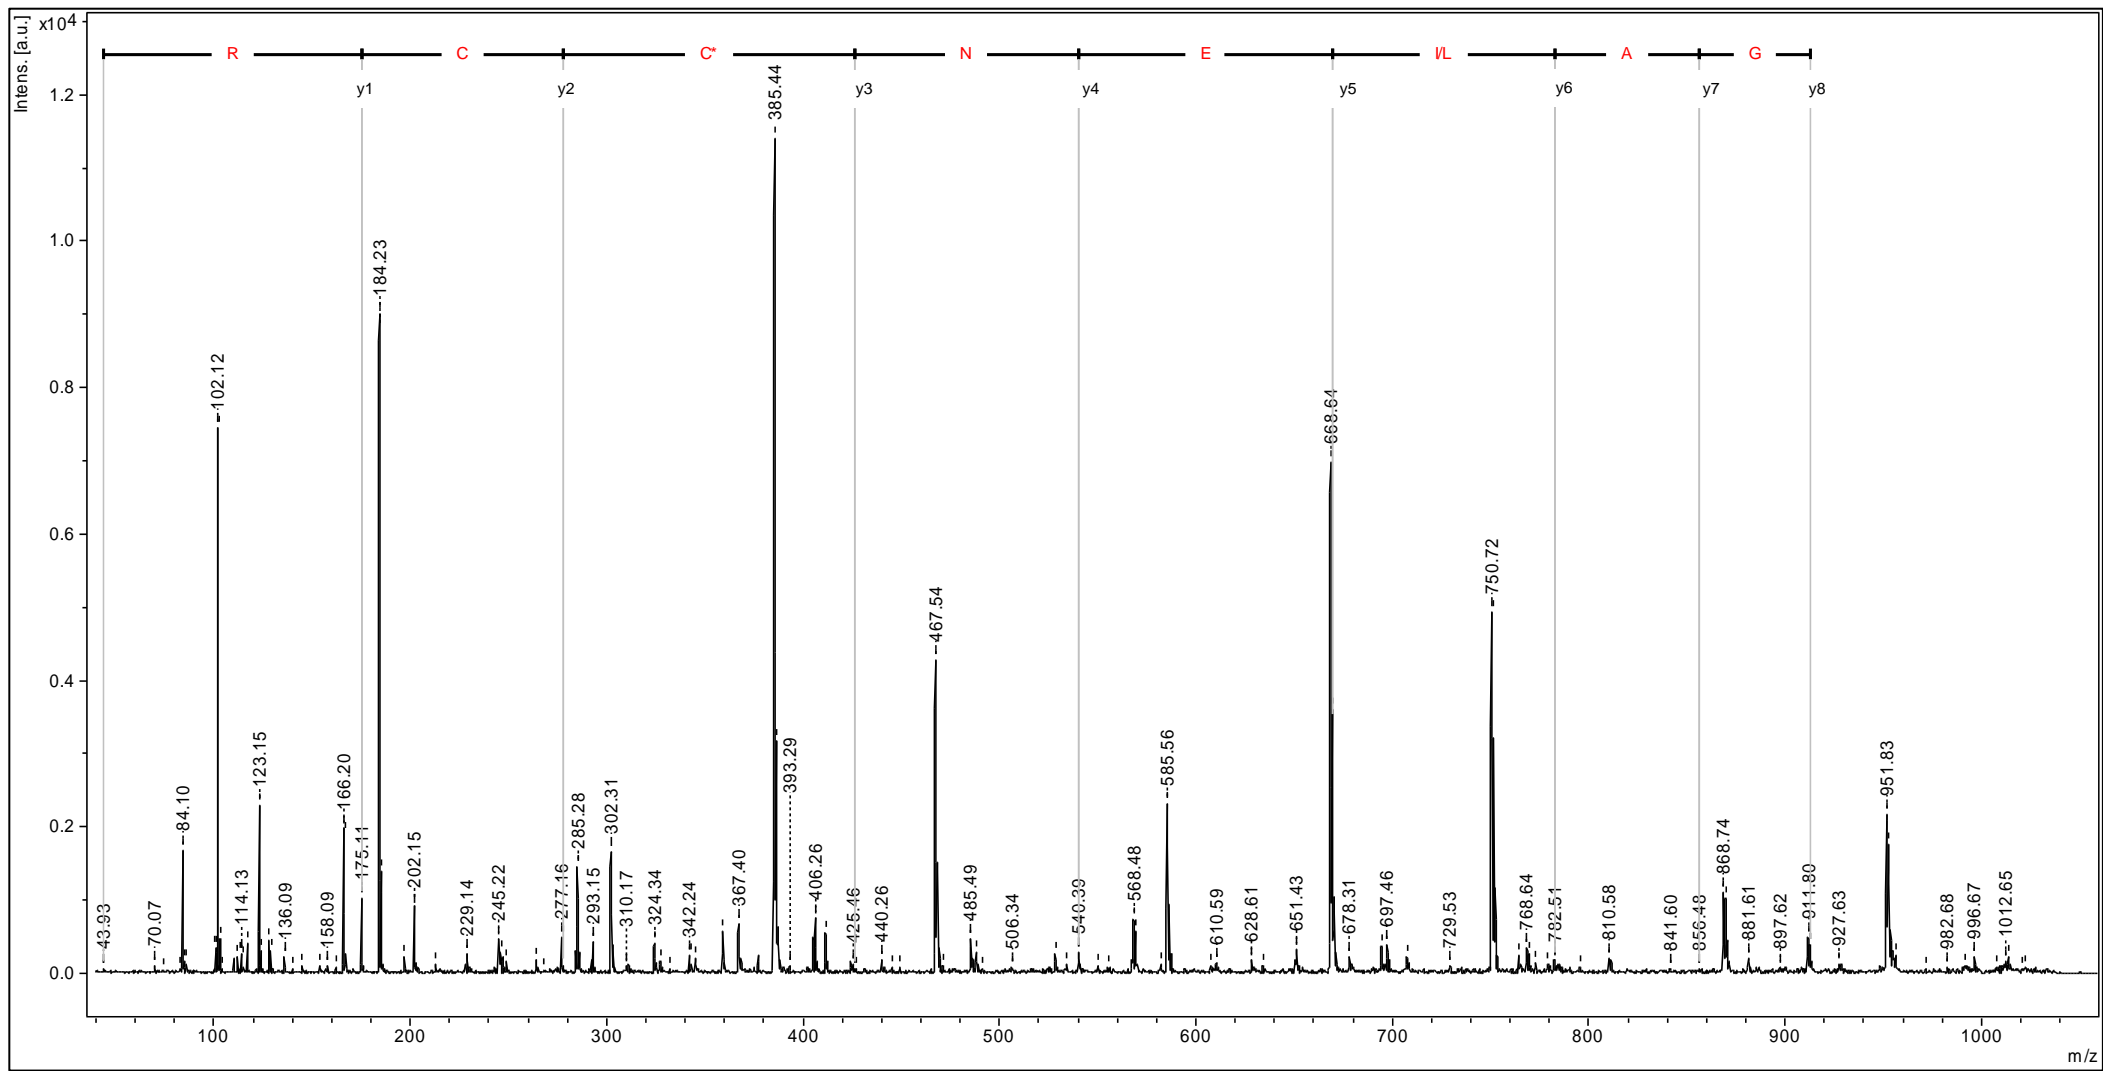

Insulin-like growth factor 2 mRNA-binding protein 1 IGF2BP1

GAIENCCR 1055.455Da

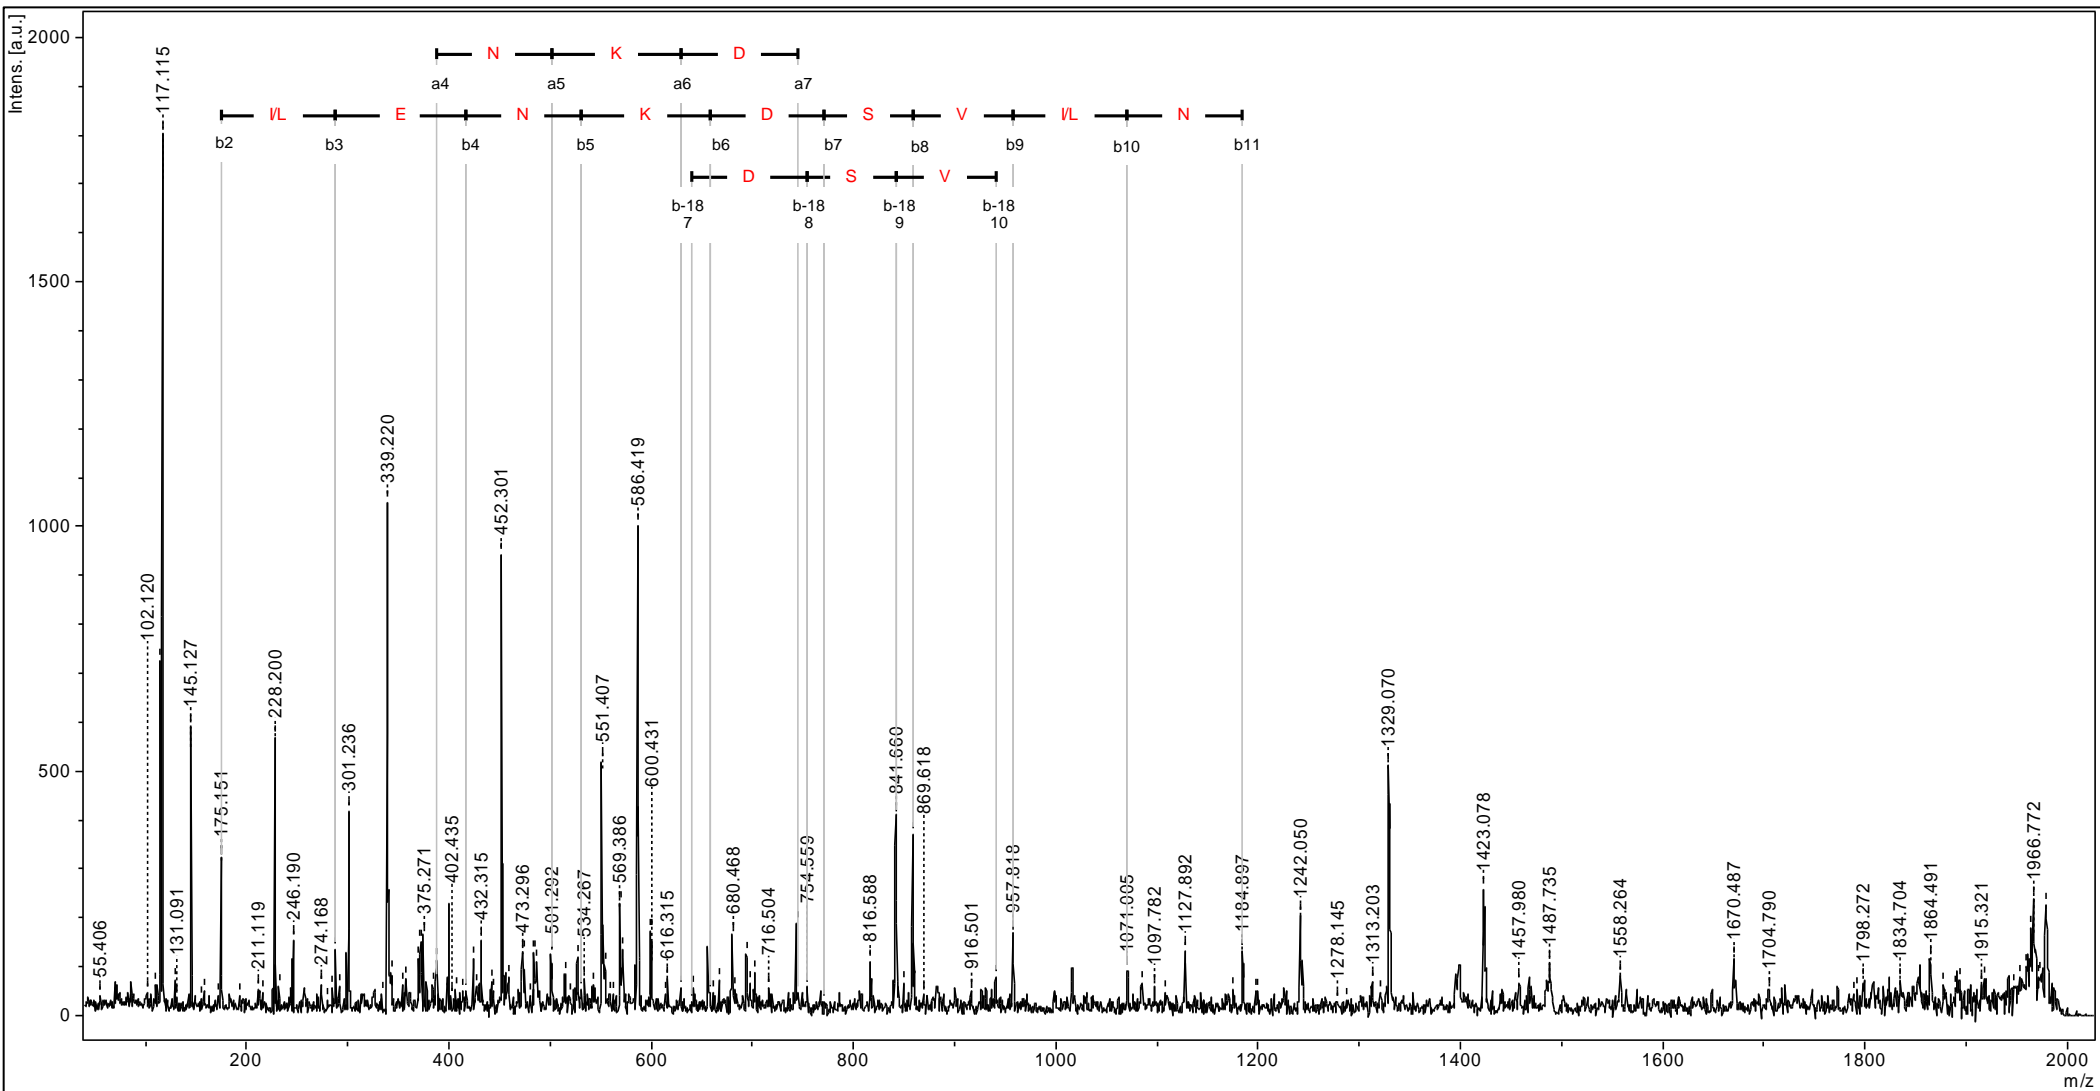

Ankyrin repeat domain-containing protein 36B ANKRD36B

ATIENKDSVLNTATKMK 2008.274 Da

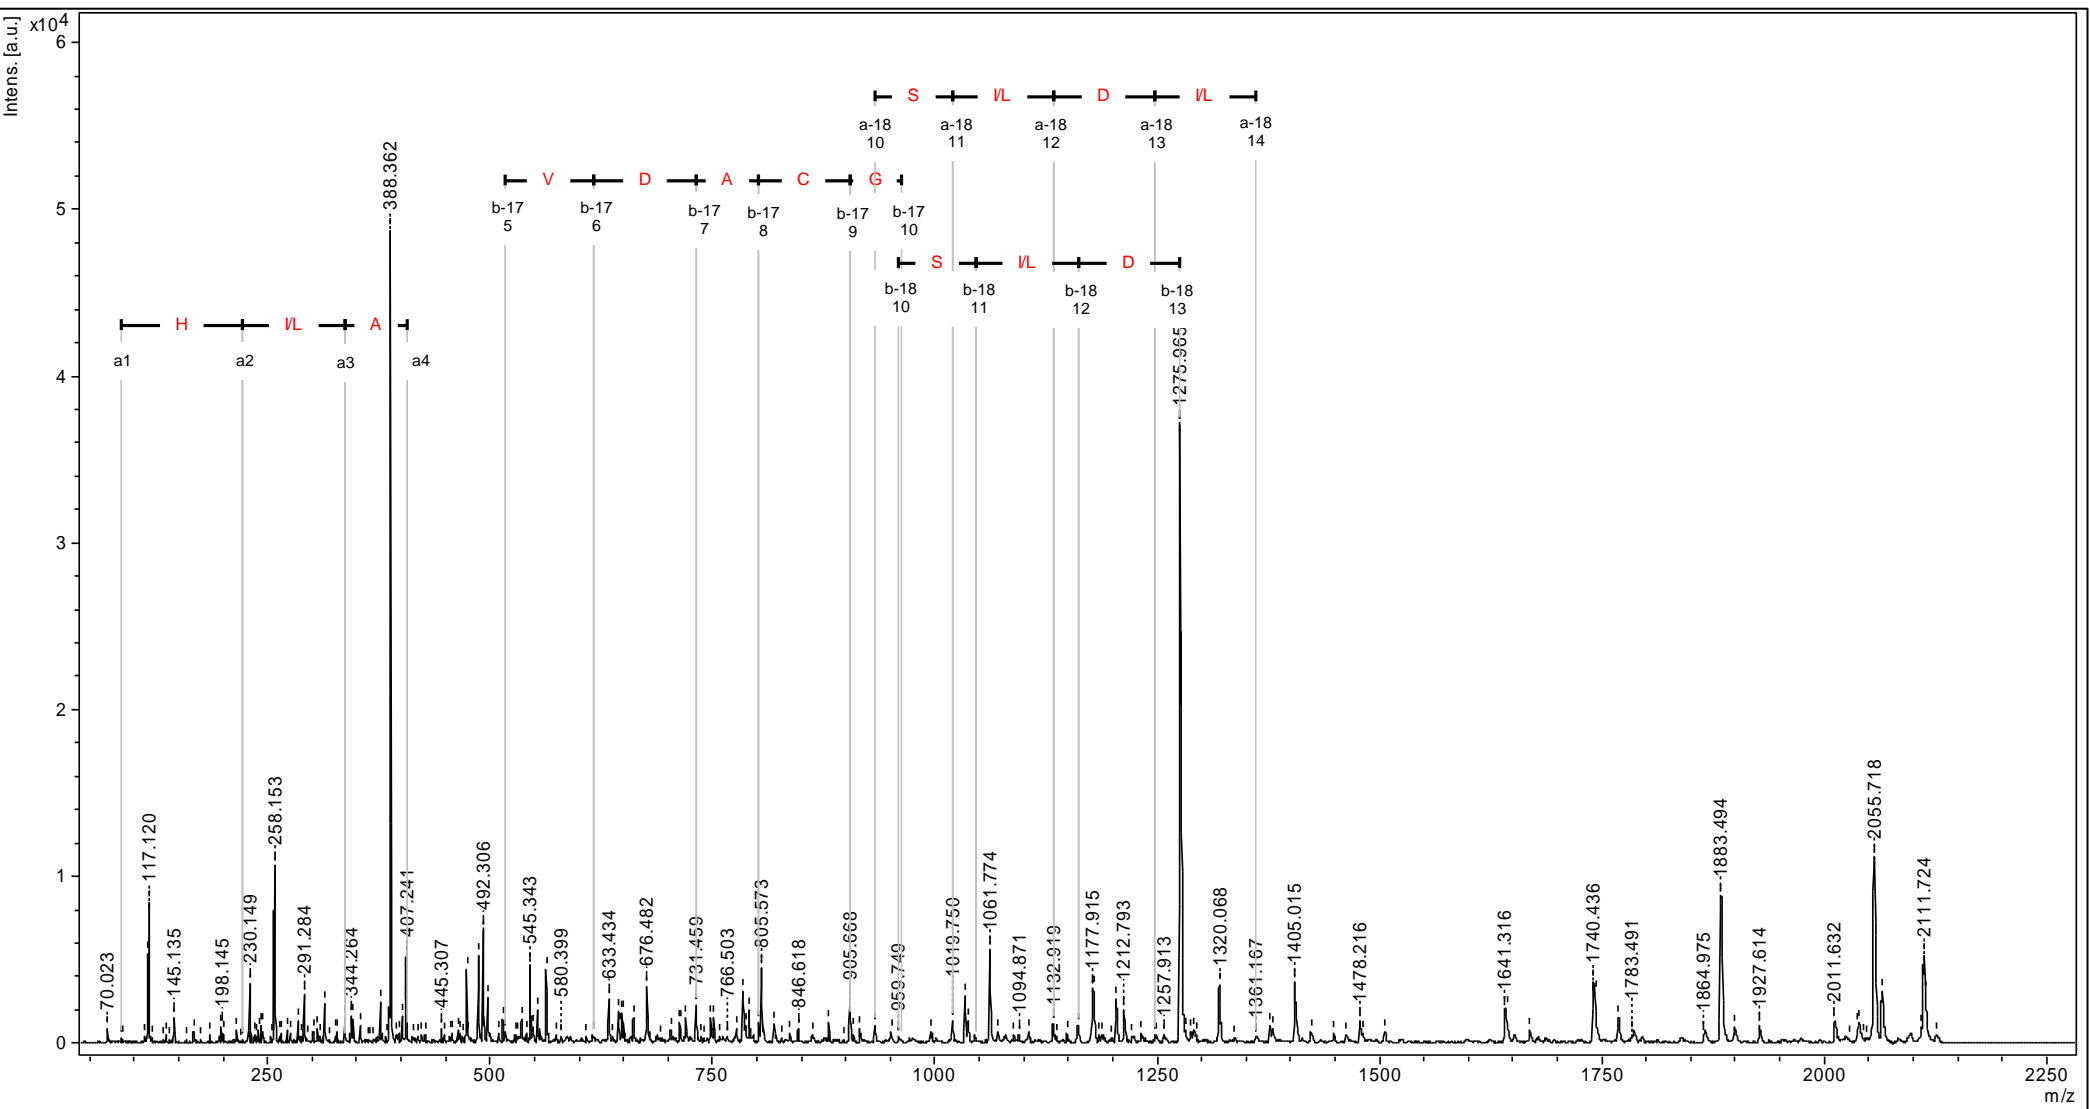

Zinc finger protein 862 ZNF862

LHLAVVDACGSIDLK 2155.135 Da
